# Supplementary material
Source: Springer Nature journal article supplement (https://www.springermedizin.de/resource/supplementary/12884_2008_177_MOESM12_ESM.pdf/9459788)

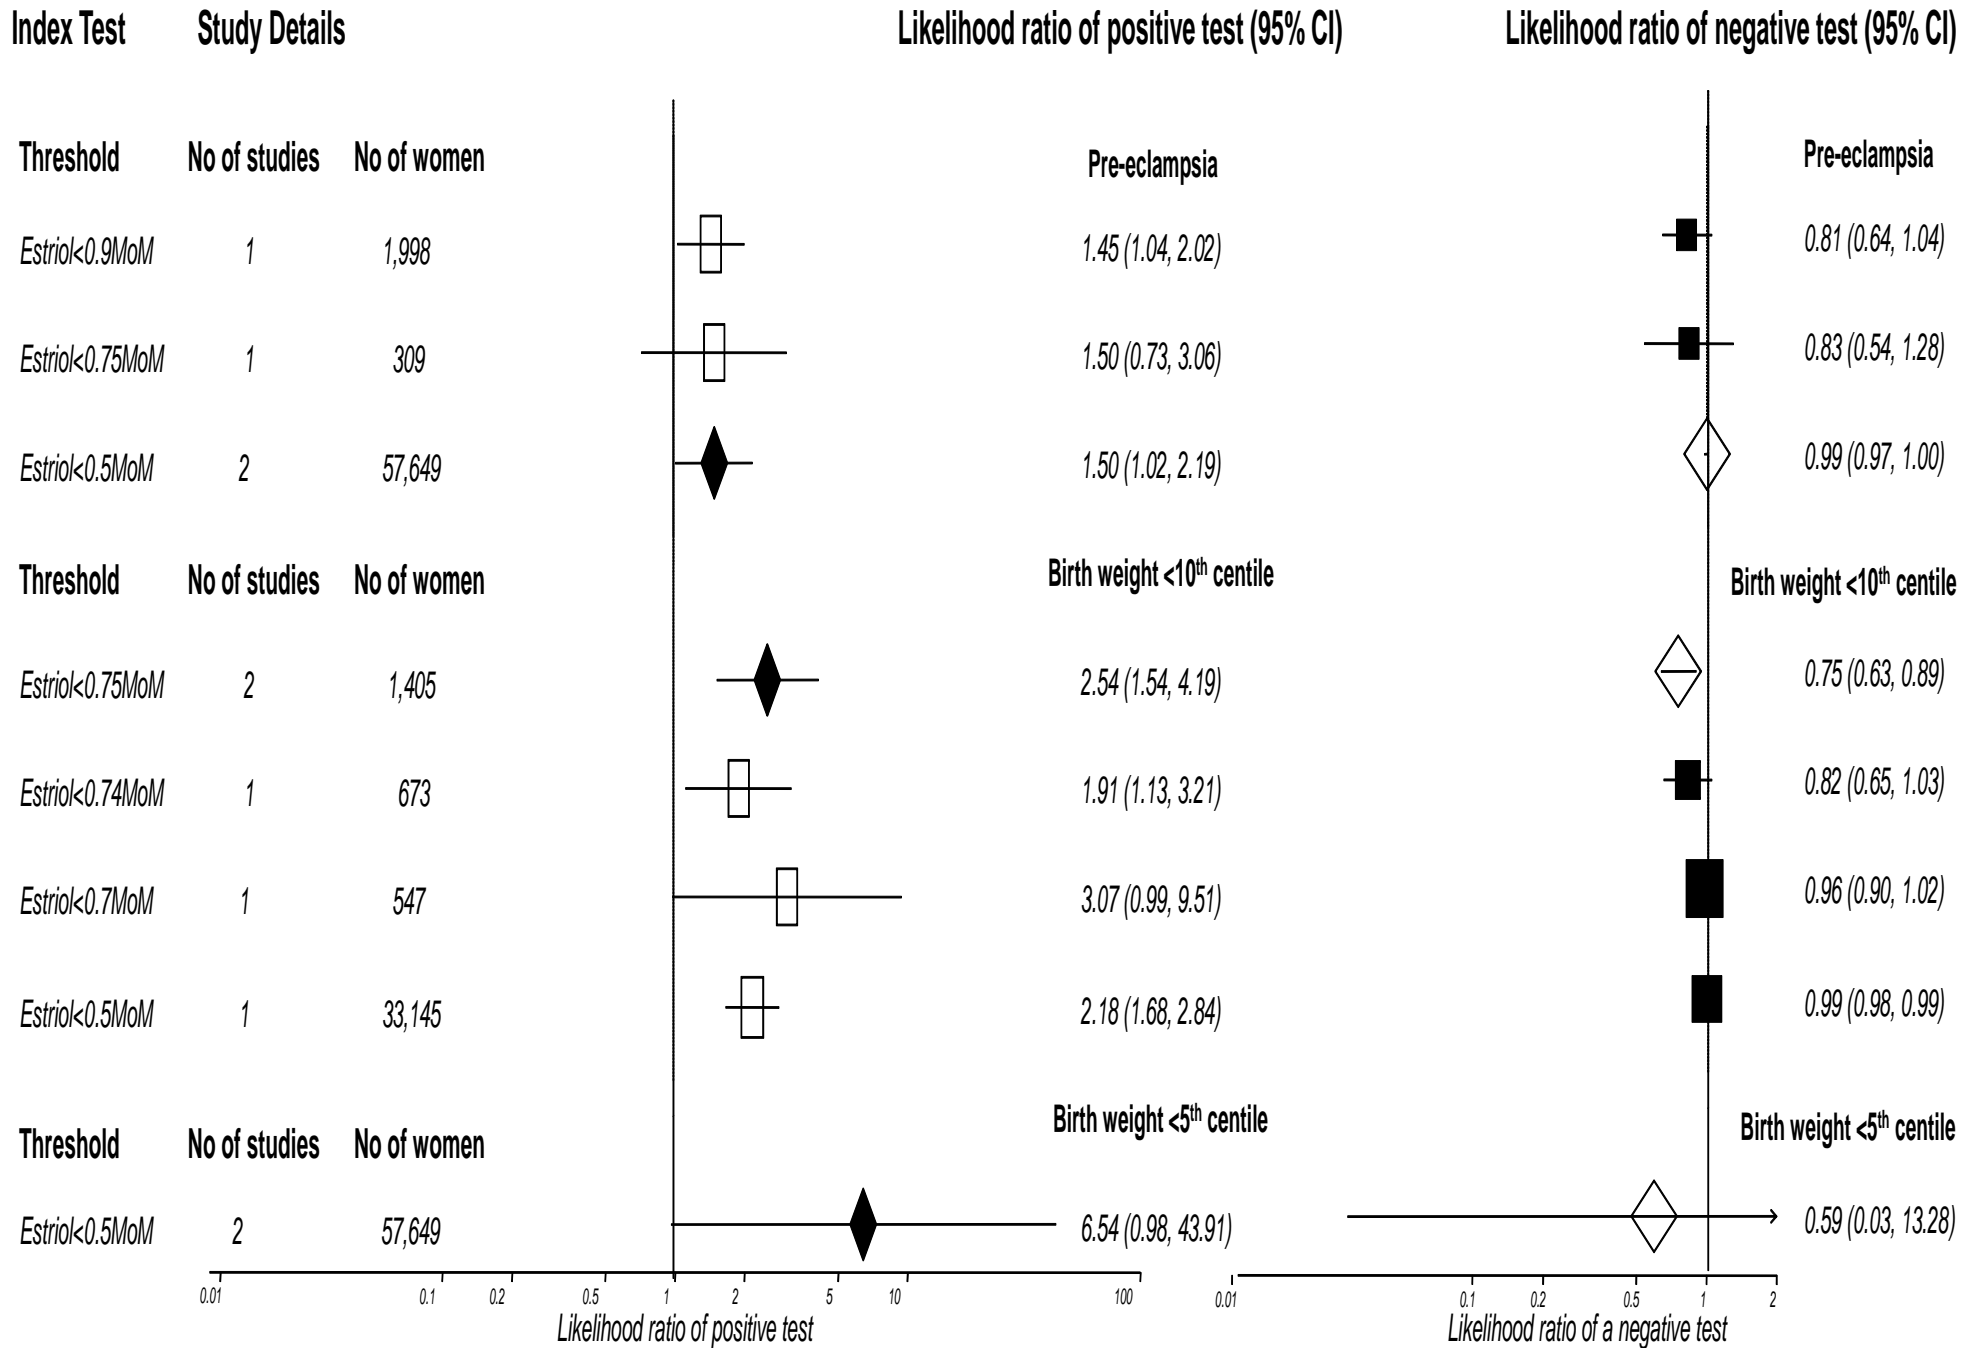

Supplement: MOESM12 [file 9459788]
